# Supplementary material for: Highly fluorescent columnar liquid crystals with elliptical molecular shape: oblique molecular stacking and excited-state intramolecular proton-transfer fluorescence
Source: Royal Society of Chemistry journal article supplement (doi:10.1039/b711883j), 2007-01-01
Supplement: b711883j.pdf [file b711883j.pdf]

# Supporting Information for

## **Highly Fluorescent Columnar Liquid Crystals with Elliptical Molecular Shape: Oblique Molecular Stacking and Excited- State Intramolecular Proton-Transfer Fluorescence**

*Jangwon Seo, Sehoon Kim, Se Hoon Gihm, Chong Rae Park, and Soo Young Park\**

School of Materials Science and Engineering, Seoul National University, Seoul 151-

744, Korea

\*Corresponding author. E-mail: parksy@snu.ac.kr

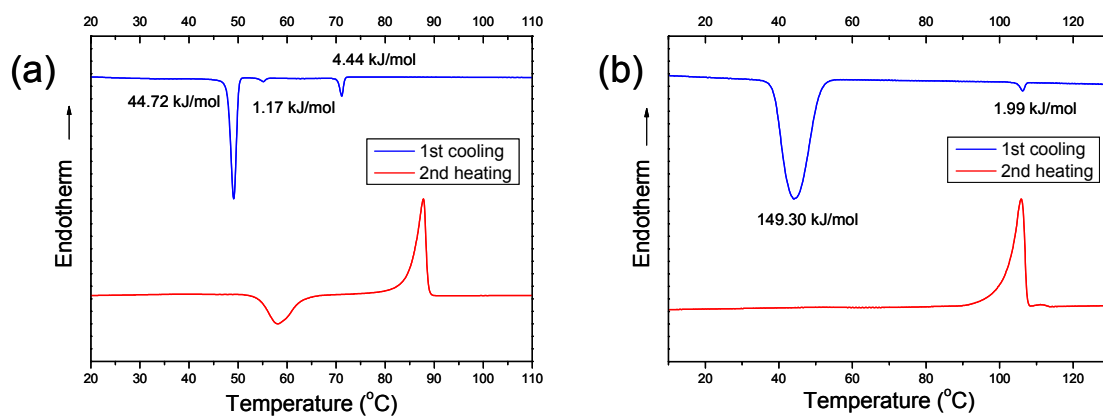

Figure S1. DSC thermograms of (a) DOXG and (b) DOXGBO.

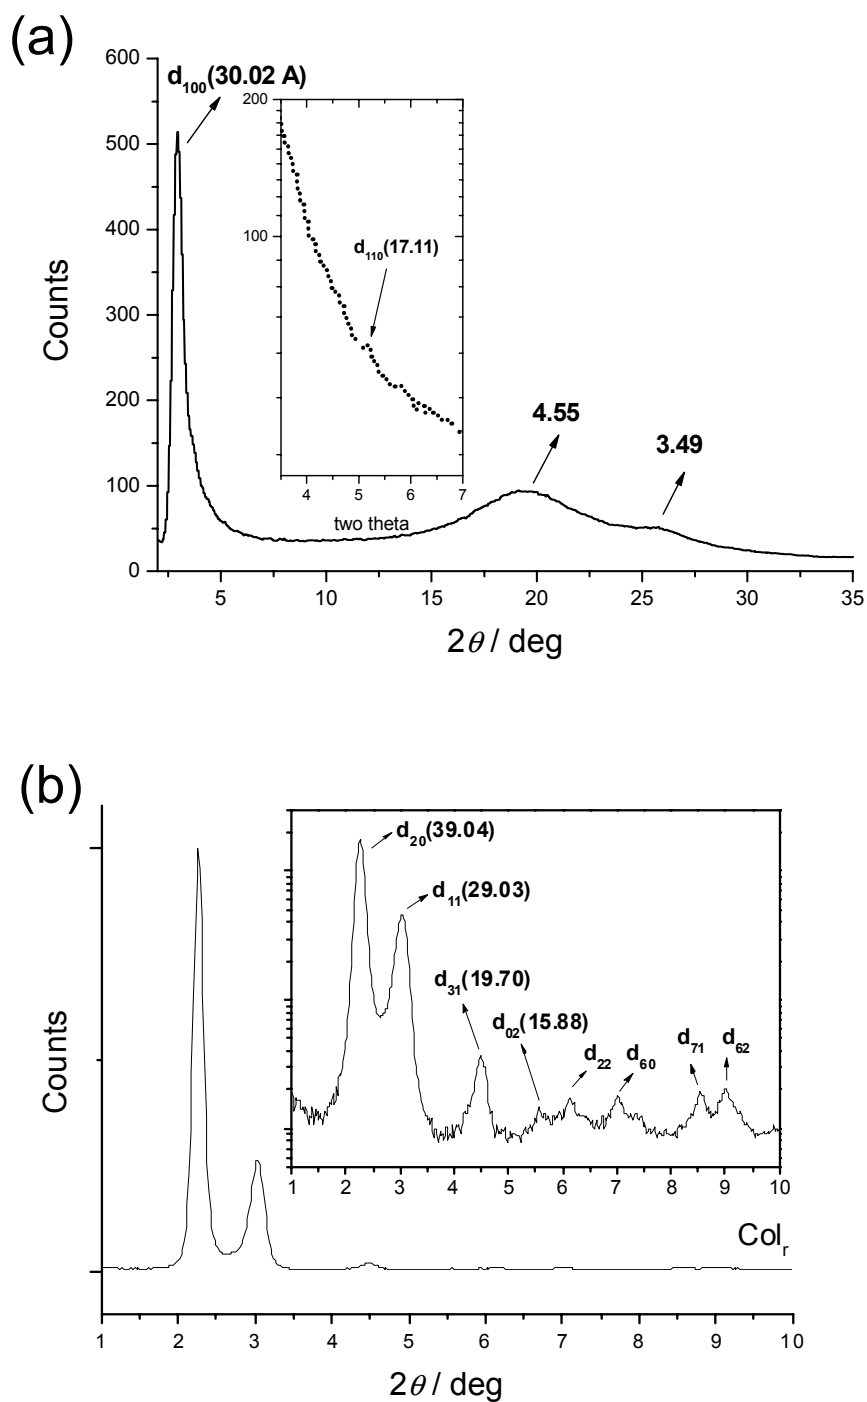

Figure S2. (a) Wide-angle X-ray diffraction pattern of DOXG in the  $Col_h$  phase, taken at high temperature ( $\sim 65^\circ\text{C}$ ). (b) Small-angle X-ray diffraction pattern of DOXG in the super-cooled state after annealing ( $Col_r$ ), taken at room temperature.

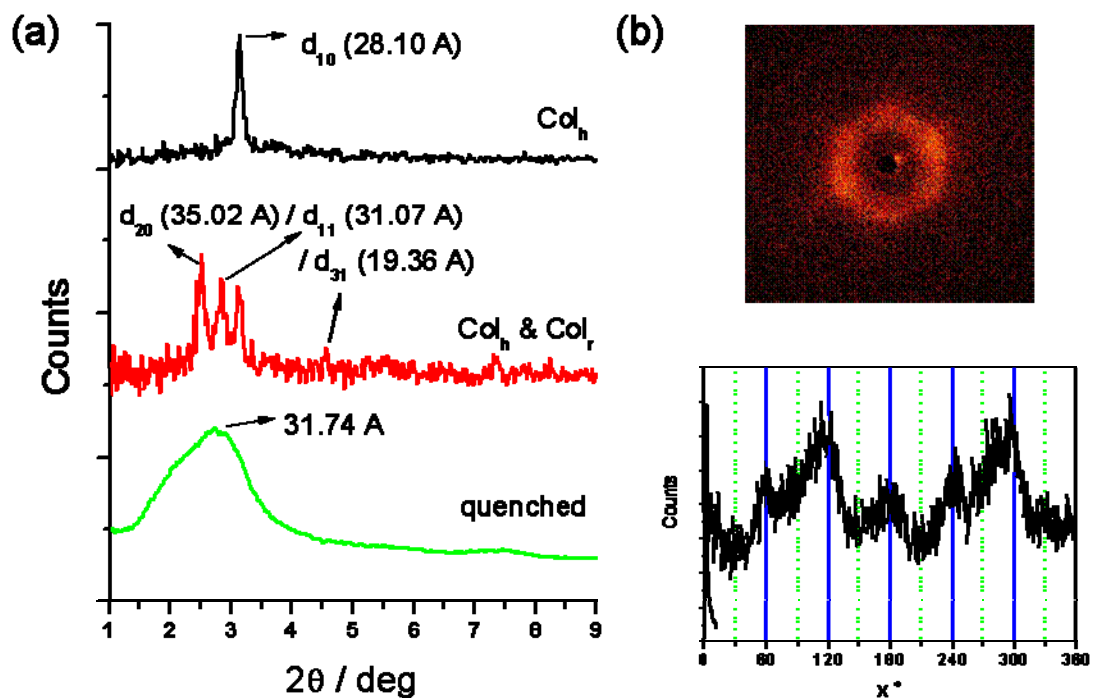

Figure S3. (a) Small-angle X-ray diffraction pattern of DOXGBO in  $Col_h$ ,  $Col_r$  (taken at high temperature), and quenched state after annealing (taken at room temperature). (b) Oriented pattern images in quenched state and its diffraction pattern along X-scan.

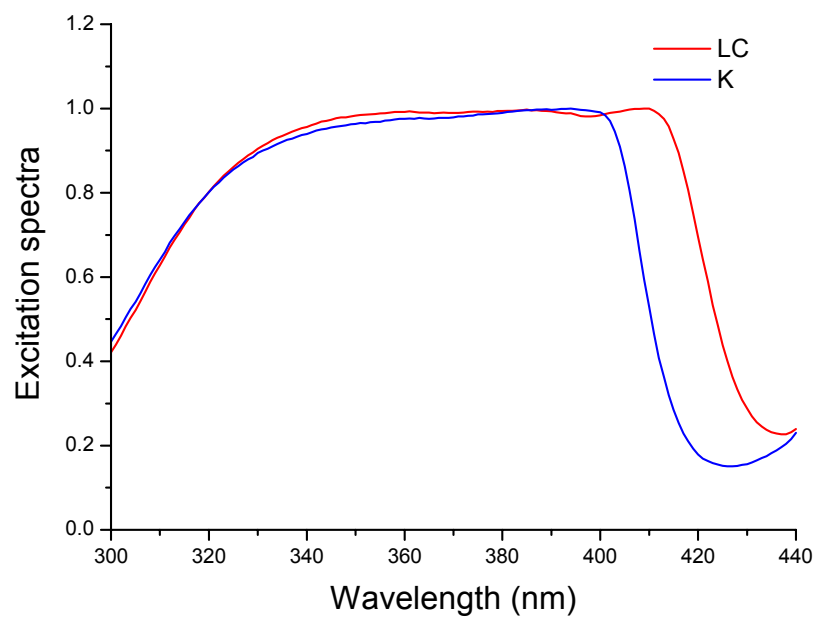

Figure S4. The excitation spectra at 460 nm in  $\text{Col}_h$  and K phases.
